# Supplementary material for: Comparative genomic analysis of the principal Cryptosporidium species that infect humans
Source: PeerJ. 2020 Dec 2;8:e10478. doi: 10.7717/peerj.10478 (PMC7718795; doi:10.7717/peerj.10478)
Supplement: Supplemental Information 4 [file peerj-08-10478-s004.xlsx]

## Sheet: Sheet1
BIC TABLE
Model	Finder will te	st 484 DNA mo	dels	(sample size	: 800861) ...
No.	Model	#NAME?	df	AIC	AICc	BIC
1	JC	3.98015e+06	45	7.96039e+06	7.96039e+06	7.96091e+06
2	JC+ASC	3.71618e+06	45	7.43245e+06	7.43245e+06	7.43297e+06
3	JC+G4	3.98006e+06	46	7.96022e+06	7.96022e+06	7.96075e+06
4	JC+ASC+G4	3.71334e+06	46	7.42677e+06	7.42677e+06	7.4273e+06
5	JC+R2	3.98008e+06	47	7.96026e+06	7.96026e+06	7.9608e+06
6	JC+R3	3.97988e+06	49	7.95985e+06	7.95985e+06	7.96042e+06
7	JC+R4	3.97927e+06	51	7.95863e+06	7.95863e+06	7.95922e+06
8	JC+R5	3.97847e+06	53	7.95705e+06	7.95705e+06	7.95767e+06
9	JC+R6	3.97791e+06	55	7.95593e+06	7.95593e+06	7.95657e+06
10	JC+R7	3.9775e+06	57	7.95511e+06	7.95511e+06	7.95577e+06
11	JC+R8	3.97714e+06	59	7.9544e+06	7.9544e+06	7.95509e+06
12	JC+R9	3.97654e+06	61	7.9532e+06	7.9532e+06	7.95391e+06
13	JC+R10	3.97654e+06	63	7.9532e+06	7.9532e+06	7.95393e+06
14	JC+ASC+R2	3.69279e+06	47	7.38567e+06	7.38567e+06	7.38621e+06
15	JC+ASC+R3	3.69279e+06	49	7.38567e+06	7.38567e+06	7.38624e+06
23	F81+F	3.96823e+06	48	7.93655e+06	7.93655e+06	7.93711e+06
24	F81+F+ASC	3.70289e+06	48	7.40588e+06	7.40588e+06	7.40643e+06
25	F81+F+G4	3.96813e+06	49	7.93637e+06	7.93637e+06	7.93693e+06
26	F81+F+ASC+G4	3.70003e+06	49	7.40015e+06	7.40015e+06	7.40072e+06
27	F81+F+R2	3.96002e+06	50	7.92014e+06	7.92014e+06	7.92072e+06
28	F81+F+R3	3.96002e+06	52	7.92014e+06	7.92014e+06	7.92074e+06
36	F81+F+ASC+R2	3.67947e+06	50	7.35904e+06	7.35904e+06	7.35962e+06
37	F81+F+ASC+R3	3.67947e+06	52	7.35904e+06	7.35904e+06	7.35965e+06
45	K2P	3.76187e+06	46	7.52384e+06	7.52384e+06	7.52437e+06
46	K2P+ASC	3.45333e+06	46	6.90675e+06	6.90675e+06	6.90729e+06
47	K2P+G4	3.76197e+06	47	7.52403e+06	7.52403e+06	7.52457e+06
48	K2P+ASC+G4	3.45032e+06	47	6.90074e+06	6.90074e+06	6.90128e+06
49	K2P+R2	3.75304e+06	48	7.50617e+06	7.50617e+06	7.50673e+06
50	K2P+R3	3.75304e+06	50	7.50618e+06	7.50618e+06	7.50676e+06
58	K2P+ASC+R2	3.43211e+06	48	6.86431e+06	6.86431e+06	6.86487e+06
59	K2P+ASC+R3	3.43211e+06	50	6.86432e+06	6.86432e+06	6.86489e+06
67	HKY+F	3.74556e+06	49	7.49123e+06	7.49123e+06	7.49179e+06
68	HKY+F+ASC	3.42967e+06	49	6.85945e+06	6.85945e+06	6.86001e+06
69	HKY+F+G4	3.74566e+06	50	7.49141e+06	7.49141e+06	7.49199e+06
70	HKY+F+ASC+G4	3.42667e+06	50	6.85343e+06	6.85343e+06	6.85401e+06
71	HKY+F+R2	3.73641e+06	51	7.47291e+06	7.47291e+06	7.4735e+06
72	HKY+F+R3	3.73641e+06	53	7.47292e+06	7.47292e+06	7.47353e+06
80	HKY+F+ASC+R2	3.4085e+06	51	6.81711e+06	6.81711e+06	6.8177e+06
81	HKY+F+ASC+R3	3.4085e+06	53	6.81711e+06	6.81711e+06	6.81772e+06
89	TNe	3.76187e+06	47	7.52384e+06	7.52384e+06	7.52438e+06
90	TNe+ASC	3.45333e+06	47	6.90675e+06	6.90675e+06	6.9073e+06
91	TNe+G4	3.76197e+06	48	7.52403e+06	7.52403e+06	7.52459e+06
92	TNe+ASC+G4	3.45032e+06	48	6.90074e+06	6.90074e+06	6.90129e+06
93	TNe+R2	3.75304e+06	49	7.50618e+06	7.50618e+06	7.50674e+06
94	TNe+R3	3.75304e+06	51	7.50618e+06	7.50618e+06	7.50677e+06
102	TNe+ASC+R2	3.43211e+06	49	6.86431e+06	6.86431e+06	6.86488e+06
103	TNe+ASC+R3	3.43211e+06	51	6.86432e+06	6.86432e+06	6.86491e+06
111	TN+F	3.74556e+06	50	7.49123e+06	7.49123e+06	7.49181e+06
112	TN+F+ASC	3.42967e+06	50	6.85945e+06	6.85945e+06	6.86003e+06
113	TN+F+G4	3.74566e+06	51	7.49141e+06	7.49141e+06	7.49201e+06
114	TN+F+ASC+G4	3.42667e+06	51	6.85343e+06	6.85343e+06	6.85402e+06
115	TN+F+R2	3.73641e+06	52	7.47291e+06	7.47291e+06	7.47352e+06
116	TN+F+R3	3.73641e+06	54	7.47292e+06	7.47292e+06	7.47354e+06
124	TN+F+ASC+R2	3.4085e+06	52	6.81711e+06	6.81711e+06	6.81771e+06
125	TN+F+ASC+R3	3.4085e+06	54	6.81711e+06	6.81711e+06	6.81773e+06
133	K3P	3.76158e+06	47	7.52325e+06	7.52325e+06	7.5238e+06
134	K3P+ASC	3.45236e+06	47	6.90482e+06	6.90482e+06	6.90536e+06
135	K3P+G4	3.76167e+06	48	7.52344e+06	7.52344e+06	7.524e+06
136	K3P+ASC+G4	3.44934e+06	48	6.89878e+06	6.89878e+06	6.89933e+06
137	K3P+R2	3.75276e+06	49	7.50563e+06	7.50563e+06	7.50619e+06
138	K3P+R3	3.75276e+06	51	7.50563e+06	7.50563e+06	7.50622e+06
146	K3P+ASC+R2	3.43109e+06	49	6.86227e+06	6.86227e+06	6.86284e+06
147	K3P+ASC+R3	3.43109e+06	51	6.86227e+06	6.86227e+06	6.86286e+06
155	K3Pu+F	3.74514e+06	50	7.49038e+06	7.49038e+06	7.49096e+06
156	K3Pu+F+ASC	3.42914e+06	50	6.85839e+06	6.85839e+06	6.85897e+06
157	K3Pu+F+G4	3.74523e+06	51	7.49057e+06	7.49057e+06	7.49116e+06
158	K3Pu+F+ASC+G4	3.42614e+06	51	6.85238e+06	6.85238e+06	6.85297e+06
159	K3Pu+F+R2	3.73602e+06	52	7.47213e+06	7.47213e+06	7.47274e+06
160	K3Pu+F+R3	3.73602e+06	54	7.47214e+06	7.47214e+06	7.47276e+06
168	K3Pu+F+ASC+R2	3.40798e+06	52	6.81607e+06	6.81607e+06	6.81667e+06
169	K3Pu+F+ASC+R3	3.40798e+06	54	6.81607e+06	6.81607e+06	6.8167e+06
177	TPM2+F	3.74166e+06	50	7.48341e+06	7.48341e+06	7.48399e+06
178	TPM2+F+ASC	3.42628e+06	50	6.85266e+06	6.85266e+06	6.85324e+06
179	TPM2+F+G4	3.74175e+06	51	7.4836e+06	7.4836e+06	7.4842e+06
180	TPM2+F+ASC+G4	3.42327e+06	51	6.84665e+06	6.84665e+06	6.84724e+06
181	TPM2+F+R2	3.7326e+06	52	7.46531e+06	7.46531e+06	7.46591e+06
182	TPM2+F+R3	3.7326e+06	54	7.46531e+06	7.46531e+06	7.46594e+06
190	TPM2+F+ASC+R2	3.40514e+06	52	6.81038e+06	6.81038e+06	6.81098e+06
191	TPM2+F+ASC+R3	3.40514e+06	54	6.81038e+06	6.81038e+06	6.81101e+06
199	TPM2u+F	3.74166e+06	50	7.48341e+06	7.48341e+06	7.48399e+06
200	TPM2u+F+ASC	3.42628e+06	50	6.85266e+06	6.85266e+06	6.85324e+06
201	TPM2u+F+G4	3.74175e+06	51	7.4836e+06	7.4836e+06	7.4842e+06
202	TPM2u+F+ASC+G4	3.42327e+06	51	6.84665e+06	6.84665e+06	6.84724e+06
203	TPM2u+F+R2	3.7326e+06	52	7.46531e+06	7.46531e+06	7.46591e+06
204	TPM2u+F+R3	3.7326e+06	54	7.46531e+06	7.46531e+06	7.46594e+06
212	TPM2u+F+ASC+R2	3.40514e+06	52	6.81038e+06	6.81038e+06	6.81098e+06
213	TPM2u+F+ASC+R3	3.40514e+06	54	6.81038e+06	6.81038e+06	6.81101e+06
221	TPM3+F	3.74152e+06	50	7.48314e+06	7.48314e+06	7.48372e+06
222	TPM3+F+ASC	3.42624e+06	50	6.85257e+06	6.85257e+06	6.85315e+06
223	TPM3+F+G4	3.74161e+06	51	7.48333e+06	7.48333e+06	7.48392e+06
224	TPM3+F+ASC+G4	3.42323e+06	51	6.84657e+06	6.84657e+06	6.84716e+06
225	TPM3+F+R2	3.7325e+06	52	7.46509e+06	7.46509e+06	7.4657e+06
226	TPM3+F+R3	3.7325e+06	54	7.4651e+06	7.4651e+06	7.46572e+06
234	TPM3+F+ASC+R2	3.40513e+06	52	6.81036e+06	6.81036e+06	6.81096e+06
235	TPM3+F+ASC+R3	3.40513e+06	54	6.81037e+06	6.81037e+06	6.81099e+06
243	TPM3u+F	3.74152e+06	50	7.48314e+06	7.48314e+06	7.48372e+06
244	TPM3u+F+ASC	3.42624e+06	50	6.85257e+06	6.85257e+06	6.85315e+06
245	TPM3u+F+G4	3.74161e+06	51	7.48333e+06	7.48333e+06	7.48392e+06
246	TPM3u+F+ASC+G4	3.42323e+06	51	6.84657e+06	6.84657e+06	6.84716e+06
247	TPM3u+F+R2	3.7325e+06	52	7.46509e+06	7.46509e+06	7.4657e+06
248	TPM3u+F+R3	3.7325e+06	54	7.4651e+06	7.4651e+06	7.46572e+06
256	TPM3u+F+ASC+R2	3.40513e+06	52	6.81036e+06	6.81036e+06	6.81096e+06
257	TPM3u+F+ASC+R3	3.40513e+06	54	6.81037e+06	6.81037e+06	6.81099e+06
265	TIMe	3.76158e+06	48	7.52325e+06	7.52325e+06	7.52381e+06
266	TIMe+ASC	3.45236e+06	48	6.90482e+06	6.90482e+06	6.90537e+06
267	TIMe+G4	3.76167e+06	49	7.52345e+06	7.52345e+06	7.52402e+06
268	TIMe+ASC+G4	3.44934e+06	49	6.89878e+06	6.89878e+06	6.89934e+06
269	TIMe+R2	3.75276e+06	50	7.50563e+06	7.50563e+06	7.50621e+06
270	TIMe+R3	3.75276e+06	52	7.50563e+06	7.50563e+06	7.50624e+06
278	TIMe+ASC+R2	3.43109e+06	50	6.86227e+06	6.86227e+06	6.86285e+06
279	TIMe+ASC+R3	3.43108e+06	52	6.86227e+06	6.86227e+06	6.86288e+06
287	TIM+F	3.74514e+06	51	7.49038e+06	7.49038e+06	7.49097e+06
288	TIM+F+ASC	3.42914e+06	51	6.85839e+06	6.85839e+06	6.85898e+06
289	TIM+F+G4	3.74523e+06	52	7.49057e+06	7.49057e+06	7.49117e+06
290	TIM+F+ASC+G4	3.42614e+06	52	6.85238e+06	6.85238e+06	6.85298e+06
291	TIM+F+R2	3.73601e+06	53	7.47214e+06	7.47214e+06	7.47275e+06
292	TIM+F+R3	3.73601e+06	55	7.47214e+06	7.47214e+06	7.47278e+06
300	TIM+F+ASC+R2	3.40798e+06	53	6.81607e+06	6.81607e+06	6.81668e+06
301	TIM+F+ASC+R3	3.40798e+06	55	6.81607e+06	6.81607e+06	6.81671e+06
309	TIM2e	3.75522e+06	48	7.51053e+06	7.51053e+06	7.51109e+06
310	TIM2e+ASC	3.44057e+06	48	6.88123e+06	6.88123e+06	6.88179e+06
311	TIM2e+G4	3.75531e+06	49	7.51072e+06	7.51072e+06	7.51129e+06
312	TIM2e+ASC+G4	3.43749e+06	49	6.87508e+06	6.87508e+06	6.87565e+06
313	TIM2e+R2	3.74641e+06	50	7.49291e+06	7.49291e+06	7.49349e+06
314	TIM2e+R3	3.7464e+06	52	7.49291e+06	7.49291e+06	7.49352e+06
322	TIM2e+ASC+R2	3.41908e+06	50	6.83826e+06	6.83826e+06	6.83884e+06
323	TIM2e+ASC+R3	3.41908e+06	52	6.83827e+06	6.83827e+06	6.83887e+06
331	TIM2+F	3.74165e+06	51	7.48341e+06	7.48341e+06	7.484e+06
332	TIM2+F+ASC	3.42628e+06	51	6.85266e+06	6.85266e+06	6.85325e+06
333	TIM2+F+G4	3.74175e+06	52	7.4836e+06	7.4836e+06	7.48421e+06
334	TIM2+F+ASC+G4	3.42327e+06	52	6.84665e+06	6.84665e+06	6.84725e+06
335	TIM2+F+R2	3.7326e+06	53	7.4653e+06	7.4653e+06	7.46592e+06
336	TIM2+F+R3	3.7326e+06	55	7.46531e+06	7.46531e+06	7.46595e+06
344	TIM2+F+ASC+R2	3.40513e+06	53	6.81037e+06	6.81037e+06	6.81099e+06
345	TIM2+F+ASC+R3	3.40513e+06	55	6.81038e+06	6.81038e+06	6.81102e+06
353	TIM3e	3.75501e+06	48	7.51012e+06	7.51012e+06	7.51068e+06
354	TIM3e+ASC	3.44043e+06	48	6.88096e+06	6.88096e+06	6.88151e+06
355	TIM3e+G4	3.75511e+06	49	7.51031e+06	7.51031e+06	7.51088e+06
356	TIM3e+ASC+G4	3.43736e+06	49	6.87481e+06	6.87481e+06	6.87538e+06
357	TIM3e+R2	3.74624e+06	50	7.49258e+06	7.49258e+06	7.49316e+06
358	TIM3e+R3	3.74624e+06	52	7.49258e+06	7.49258e+06	7.49318e+06
366	TIM3e+ASC+R2	3.419e+06	50	6.83809e+06	6.83809e+06	6.83867e+06
367	TIM3e+ASC+R3	3.419e+06	52	6.8381e+06	6.8381e+06	6.8387e+06
375	TIM3+F	3.74152e+06	51	7.48313e+06	7.48313e+06	7.48372e+06
376	TIM3+F+ASC	3.42624e+06	51	6.85258e+06	6.85258e+06	6.85317e+06
377	TIM3+F+G4	3.74161e+06	52	7.48332e+06	7.48332e+06	7.48393e+06
378	TIM3+F+ASC+G4	3.42323e+06	52	6.84657e+06	6.84657e+06	6.84717e+06
379	TIM3+F+R2	3.73249e+06	53	7.46509e+06	7.46509e+06	7.46571e+06
380	TIM3+F+R3	3.73249e+06	55	7.4651e+06	7.4651e+06	7.46573e+06
388	TIM3+F+ASC+R2	3.40513e+06	53	6.81036e+06	6.81036e+06	6.81098e+06
389	TIM3+F+ASC+R3	3.40513e+06	55	6.81037e+06	6.81037e+06	6.811e+06
397	TVMe	3.74833e+06	49	7.49676e+06	7.49676e+06	7.49733e+06
398	TVMe+ASC	3.4276e+06	49	6.8553e+06	6.8553e+06	6.85586e+06
399	TVMe+G4	3.74843e+06	50	7.49695e+06	7.49695e+06	7.49753e+06
400	TVMe+ASC+G4	3.42445e+06	50	6.84901e+06	6.84901e+06	6.84959e+06
401	TVMe+R2	3.73957e+06	51	7.47925e+06	7.47925e+06	7.47984e+06
402	TVMe+R3	3.73957e+06	53	7.47925e+06	7.47925e+06	7.47987e+06
410	TVMe+ASC+R2	3.40591e+06	51	6.81193e+06	6.81193e+06	6.81252e+06
411	TVMe+ASC+R3	3.40591e+06	53	6.81193e+06	6.81193e+06	6.81254e+06
419	TVM+F	3.73756e+06	52	7.47522e+06	7.47522e+06	7.47582e+06
420	TVM+F+ASC	3.4228e+06	52	6.8457e+06	6.8457e+06	6.8463e+06
421	TVM+F+G4	3.73765e+06	53	7.47541e+06	7.47541e+06	7.47603e+06
422	TVM+F+ASC+G4	3.4198e+06	53	6.8397e+06	6.8397e+06	6.84032e+06
423	TVM+F+R2	3.72863e+06	54	7.45737e+06	7.45737e+06	7.458e+06
424	TVM+F+R3	3.72863e+06	56	7.45738e+06	7.45738e+06	7.45803e+06
432	TVM+F+ASC+R2	3.40172e+06	54	6.80356e+06	6.80356e+06	6.80418e+06
433	TVM+F+ASC+R3	3.40172e+06	56	6.80356e+06	6.80356e+06	6.80421e+06
441	SYM	3.74833e+06	50	7.49677e+06	7.49677e+06	7.49735e+06
442	SYM+ASC	3.4276e+06	50	6.8553e+06	6.8553e+06	6.85588e+06
443	SYM+G4	3.74843e+06	51	7.49695e+06	7.49695e+06	7.49755e+06
444	SYM+ASC+G4	3.42445e+06	51	6.84901e+06	6.84901e+06	6.8496e+06
445	SYM+R2	3.73957e+06	52	7.47925e+06	7.47925e+06	7.47986e+06
446	SYM+R3	3.73957e+06	54	7.47926e+06	7.47926e+06	7.47988e+06
454	SYM+ASC+R2	3.40591e+06	52	6.81193e+06	6.81193e+06	6.81253e+06
455	SYM+ASC+R3	3.40591e+06	54	6.81193e+06	6.81193e+06	6.81256e+06
463	GTR+F	3.73756e+06	53	7.47523e+06	7.47523e+06	7.47584e+06
464	GTR+F+ASC	3.4228e+06	53	6.8457e+06	6.8457e+06	6.84632e+06
465	GTR+F+G4	3.73765e+06	54	7.47542e+06	7.47542e+06	7.47604e+06
466	GTR+F+ASC+G4	3.4198e+06	54	6.8397e+06	6.8397e+06	6.84033e+06
467	GTR+F+R2	3.72863e+06	55	7.45738e+06	7.45738e+06	7.45801e+06
468	GTR+F+R3	3.72863e+06	57	7.45738e+06	7.45738e+06	7.45804e+06
476	GTR+F+ASC+R2	3.40172e+06	55	6.80356e+06	6.80356e+06	6.80419e+06
477	GTR+F+ASC+R3	3.40172e+06	57	6.80356e+06	6.80356e+06	6.80422e+06
Akaike Information Criterion: GTR+F+ASC+R2
Corrected Akaike Information Criterion: GTR+F+ASC+R2
Bayesian Information Criterion: TVM+F+ASC+R2
Best-fit model: TVM+F+ASC+R2 chosen according to BIC
